# Supplementary material for: Solution-Processed Bulk Heterojunction Solar Cells with Silyl End-Capped Sexithiophene
Source: Hindawi journal article supplement (doi:10.1155/2013/843615), 2013-01-01
Supplement: f1 [file 843615.f1.pdf]

## *Complementary Supporting Information's*

### **Solution-processed bulk heterojunction solar cells with silyl end-capped sexithiophene**

Jung Hei Choi, Mohamed E. El-Khouly, Taehee Kim, Youn Su Kim, Dae Won Cho, Ung Chan Yoon, Shunichi Fukuzumi, and Kyungkon Kim

#### **Caption Figures**

Fig. S1. Steady-state fluorescence spectra of **DH-6T** and **DSi-6T** in benzonitrile;  $\lambda_{\text{ex}} = 415$  nm.

Fig. S2. DPV voltammograms of **DSi-6T**, **DH-6T** and PCBM in deaerated benzonitrile. Scan rate =  $50 \text{ mV s}^{-1}$ .

Fig. S3. CV of **DH-6T** in deaerated benzonitrile. Scan rate =  $50 \text{ mV s}^{-1}$ .

Fig. S4. CV of **DSi-6T** in deaerated benzonitrile. Scan rate =  $50 \text{ mV s}^{-1}$ .

Fig. S5. CV of **PCBM** in deaerated benzonitrile. Scan rate =  $50 \text{ mV s}^{-1}$ .

Fig. S6. (upper) Nanosecond transient spectra of **DSi-6T** (0.05 mM) in deaerated benzonitrile;  $\lambda_{\text{ex}} = 440$  nm. (lower) Decay-time profile of  $^3\text{DSi-6T}^*$  at 710 nm.

Fig. S7. Nanosecond transient spectra of **DH-6T** (0.05 mM) in the presence of PCBM (0.1 mM) in deaerated benzonitrile;  $\lambda_{\text{ex}} = 440$  nm. Inset: Decay-time profile of  $^3\text{DH-6T}^*$  (700 nm), and rise-profile of  $\text{DH-6T}^{*+}$  (800 nm).

Fig. S8. Nanosecond transient spectra of **DH-6T** (0.05 mM) in the presence of PCBM (0.05 mM) in deaerated benzonitrile;  $\lambda_{\text{ex}} = 440$  nm. Inset: Decay-time profile of  $^3\text{DH-6T}^*$  (700 nm), and rise-profiles of  $\text{DH-6T}^{*+}$  (800 and 1500 nm) and  $\text{PCBM}^{\cdot-}$  (1000 nm).

Fig. S9. Dependence of rate constant of the formation of  $\text{DH-6T}^{*+}$  at 800 nm on concentration of PCBM in deaerated benzonitrile. Inset: First-order plot.

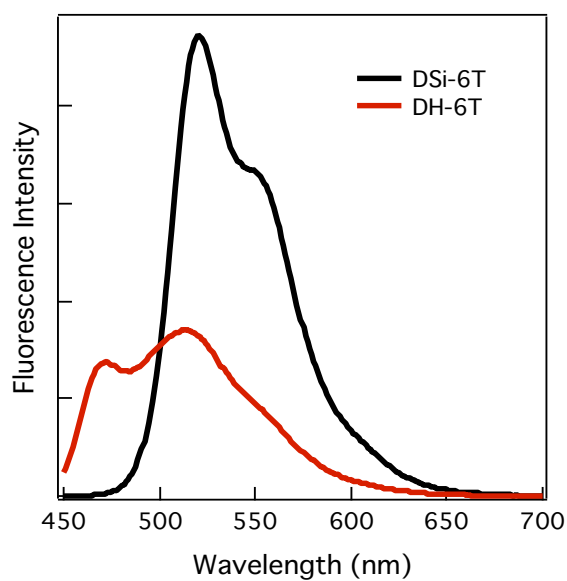

Fig. S1. Steady-state fluorescence spectra of **DH-6T** and **DSi-6T** in benzonitrile;  $\lambda_{\text{ex}} = 415$  nm.

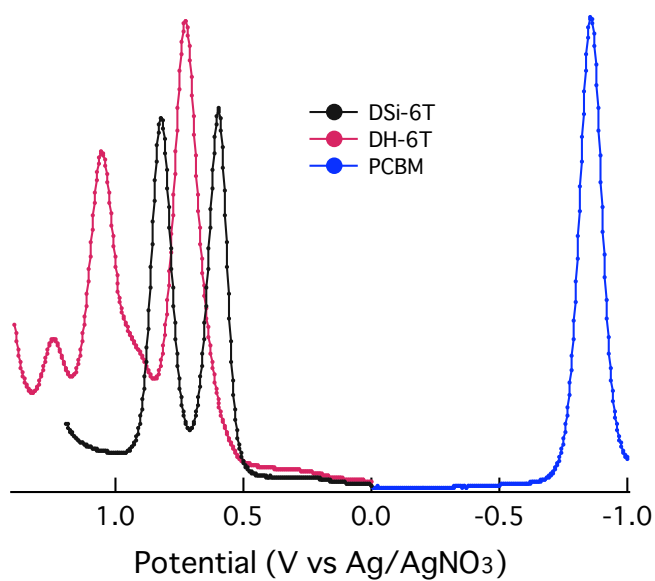

Fig. S2. DPV voltammograms of **DSi-6T**, **DH-6T** and **PCBM** in deaerated benzonitrile. Scan rate =  $50 \text{ mV s}^{-1}$ .

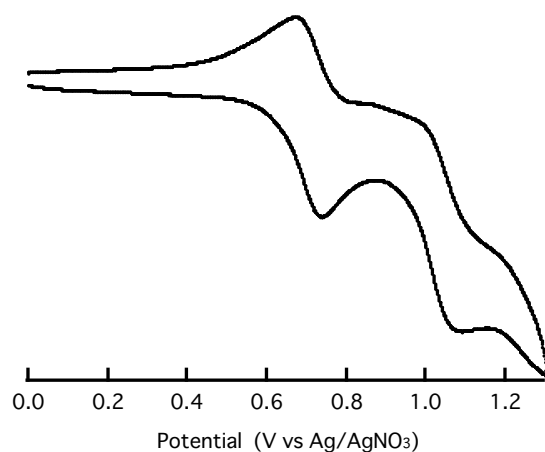

Fig. S3. CV of **DH-6T** in deaerated benzonitrile. Scan rate =  $50 \text{ mV s}^{-1}$ .

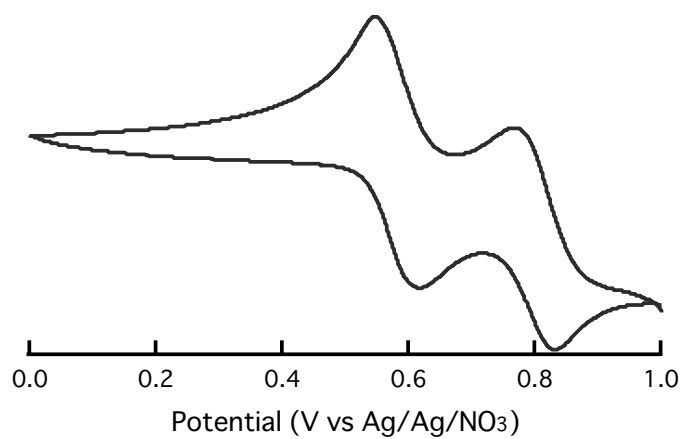

Fig. S4. CV of **DSi-6T** in deaerated benzonitrile. Scan rate =  $50 \text{ mV s}^{-1}$ .

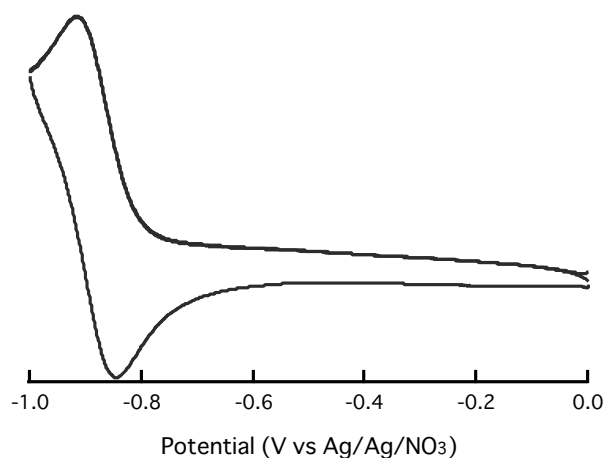

Fig. S5. CV of **PCBM** in deaerated benzonitrile. Scan rate =  $50 \text{ mV s}^{-1}$ .

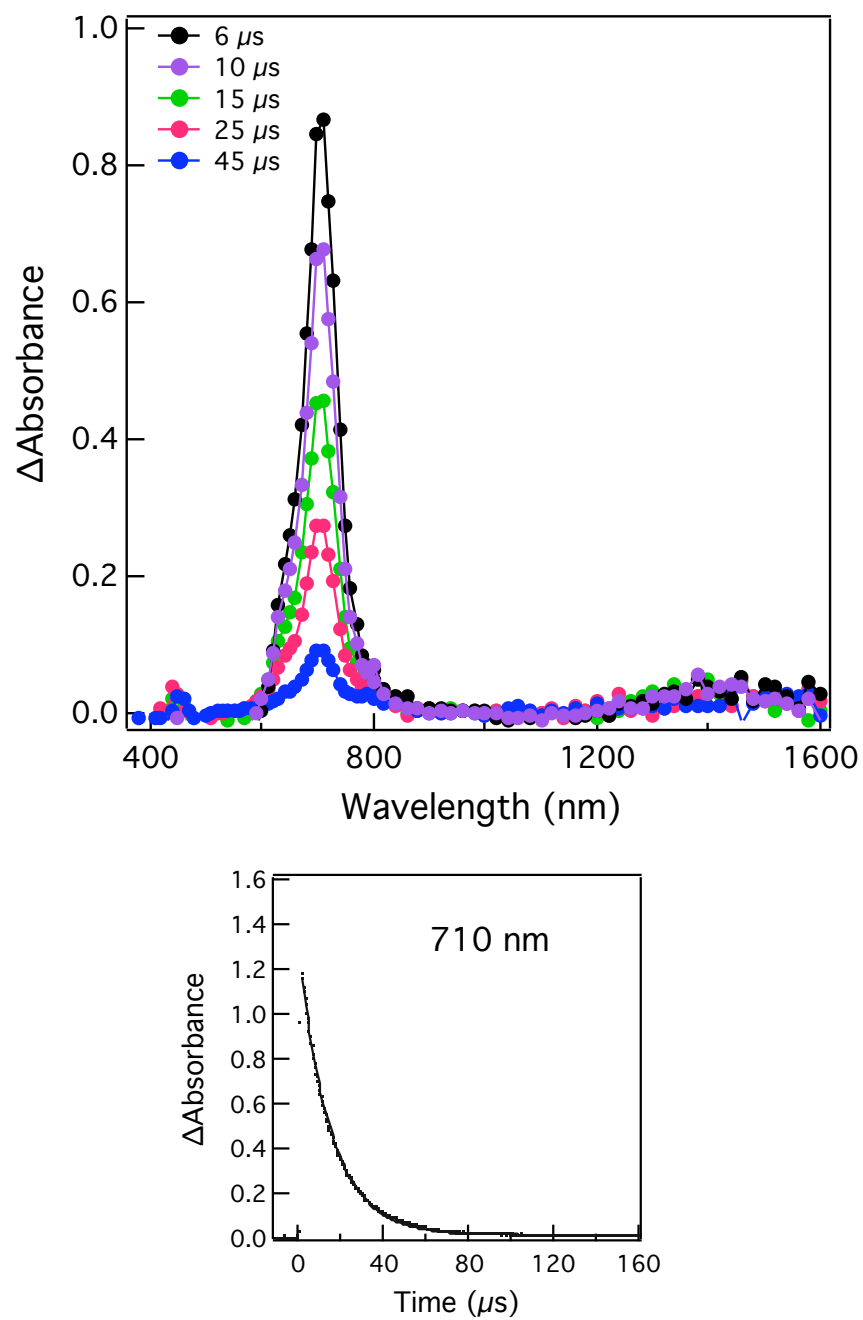

Fig. S6. (upper) Nanosecond transient spectra of **DSi-6T** (0.05 mM) in deaerated benzonitrile;  $\lambda_{\text{ex}}$  = 440 nm. (lower) Decay-time profile of  $^3$ **DSi-6T\*** at 710 nm.

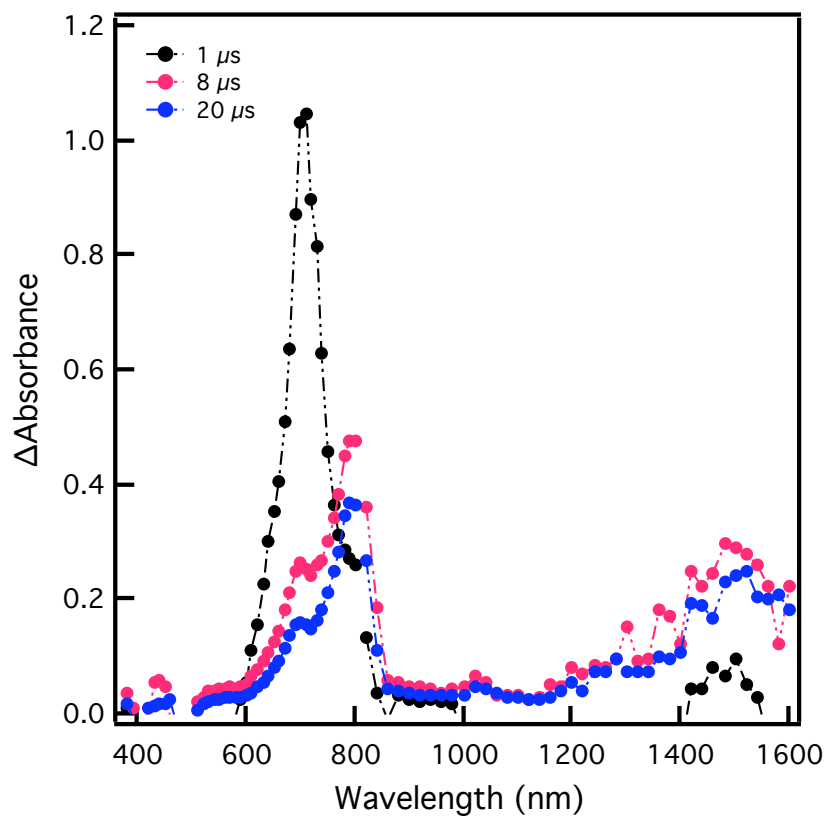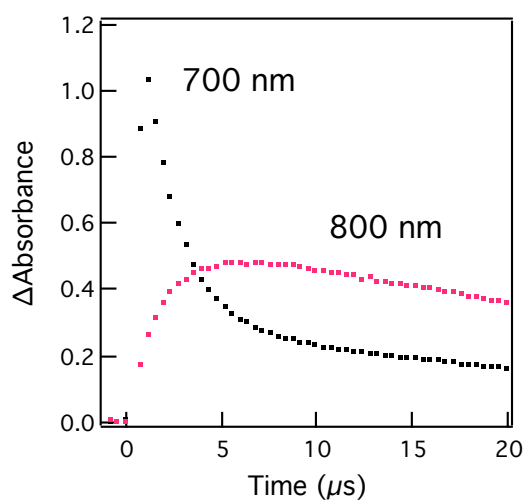

Fig. S7. Nanosecond transient spectra of **DH-6T** (0.05 mM) in the presence of PCBM (0.1 mM) in deaerated benzonitrile;  $\lambda_{\text{ex}} = 440$  nm. Inset: Decay-time profile of  $^3\text{DH-6T}^*$  (700 nm), and rise-profile of  $\text{DH-6T}^{++}$  (800 nm).

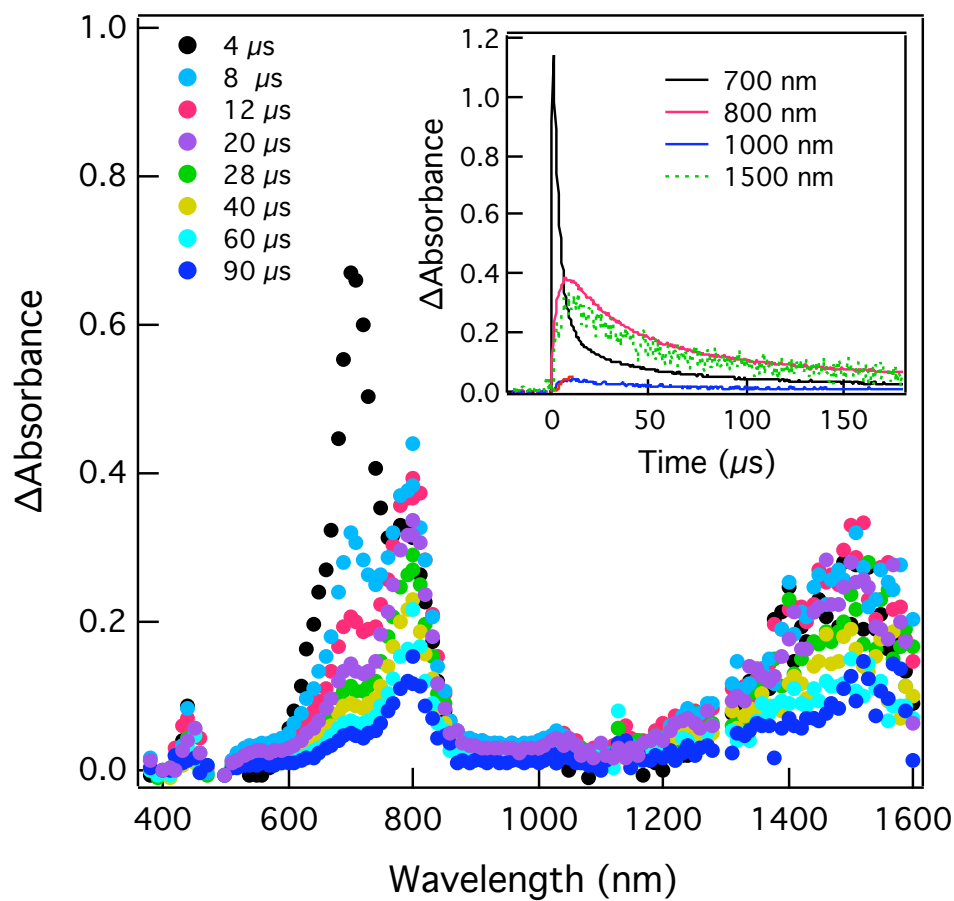

Fig. S8. Nanosecond transient spectra of **DH-6T** (0.05 mM) in the presence of PCBM (0.05 mM) in deaerated benzonitrile;  $\lambda_{\text{ex}} = 440$  nm. Inset: Decay-time profile of  $^3\text{DH-6T}^*$  (700 nm), and rise-profiles of  $\text{DH-6T}^{++}$  (800 and 1500 nm) and  $\text{PCBM}^-$  (1000 nm).

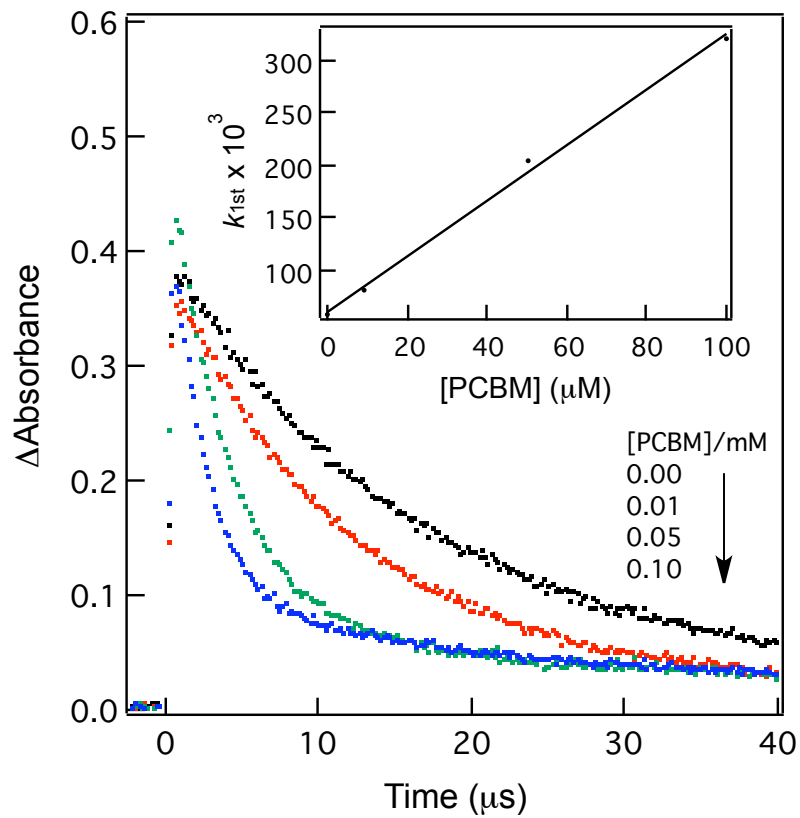

Fig. S9. Dependence of rate constant of the formation of  $\text{DH-6T}^{++}$  at 800 nm on concentration of PCBM in deaerated benzonitrile. Inset: First-order plot.
